# Supplementary material for: Reconciling conflicting evidence for the cause of the observed early 21st century Eurasian cooling
Source: Copernicus journal article supplement (doi:10.5194/wcd-2022-32), 2022-06-20
Supplement: Supplementary file 1 [file wcd-2022-32-supplement.pdf]

# Supporting Information for "Eurasian Cooling Synthesis Paper"

Stephen Outten<sup>1,2,\*</sup>, Camille Li<sup>3,2,\*</sup>, Martin P. King<sup>3,4,2</sup>, Lingling Suo<sup>1,2</sup>, Peter Y. F. Siew<sup>3,2</sup>, Richard Davy<sup>1,2</sup>, Hoffmann Cheung<sup>5,6,2</sup>, Etienne Dunn-Sigouin<sup>3,2</sup>, Tore Furevik<sup>1,2</sup>, Shengping He<sup>3,2</sup>, Erica Madonna<sup>3,2</sup>, Stefan Sobolowski<sup>4,2</sup>, Thomas Spengler<sup>3,2</sup>, and Tim Woollings<sup>7</sup>

<sup>1</sup>Nansen Environmental and Remote Sensing Center, Bergen, Norway

<sup>2</sup>Bjerknes Centre for Climate Research, Bergen, Norway

<sup>3</sup>Geophysical Institute, University of Bergen, Bergen, Norway

<sup>4</sup>NORCE Norwegian Research Centre, Bergen, NORWAY

<sup>5</sup>School of Atmospheric Sciences & Guangdong Province Key Laboratory for Climate Change and Natural Disaster Studies, Sun Yat-sen University, Zhuhai, China

<sup>6</sup>Southern Marine Science and Engineering Guangdong Laboratory (Zhuhai), Zhuhai, China

<sup>7</sup>Atmospheric, Oceanic and Planetary Physics, University of Oxford, Oxford, United Kingdom

\*These authors contributed equally to this work.

**Correspondence:** Stephen Outten (stephen.outten@nersc.no)

## Contents of this file

1. Description of the autoregressive model used in Section 5.
2. Figure S1: Trends of "WACE" using least square and Theil-Sen methods.
3. Figure S2: Trends of Eurasian surface air temperature in various regions.
- 5 4. Figure S3: Sea ice area in March from 1979 to 2019 and the linear trends.
5. Figure S4: Eurasian winter temperature variability.

## Description of the autoregressive model used in Section 5

Our AR1 model is defined by the following equation:

$$T_{i+1} = \rho_{-1}T_i + \sigma\sqrt{1 - \rho_{-1}^2}N(0, 1), \quad (1)$$

- 10 where  $\sigma$  is the standard deviation of Eurasian DJF temperature,  $\rho_{-1}$  is the partial lag-1 autocorrelation, and  $N(0,1)$  is Gaussian noise. The model represents temperature at one timestep ( $T_{i+1}$ ) is dependent on the previous value ( $T_i$ ) plus noise. While the lag autocorrelations over the full period are small and not statistically significant, we use a nominal value here of  $\rho_{-1} = 0.2$  in order to maintain the form of the above equation. The parameter space for a range of  $\rho_{-1}$  and  $\sigma$  values was examined and it was found that the impact on the generated trends in the choice of  $\rho_{-1}$  is small compared to the impact of the value of  $\sigma$ , which
- 15 ranges from  $<1$  K to nearly 2 K for decadal time scales (Supplemental Figure S4), and represents a factor of two difference in the expected spread from internal variability. With the AR1 model, we create 20,000 time series, each 15 years long and starting from the initial temperature of  $T_0 = 0$  K. For each of these time series, we determine the temperature trend over the 15-year period, so that together they provide us with a PDF of Eurasian DJF temperature trends consistent with the observed 15-year trends over the period covered by the reanalysis (Figure 5b). We believe this model is adequate for the purpose of illustrating
- 20 our explanations, but more complex and accurate model can possibly be devised after examining the statistical properties of the observed time series more deeply.

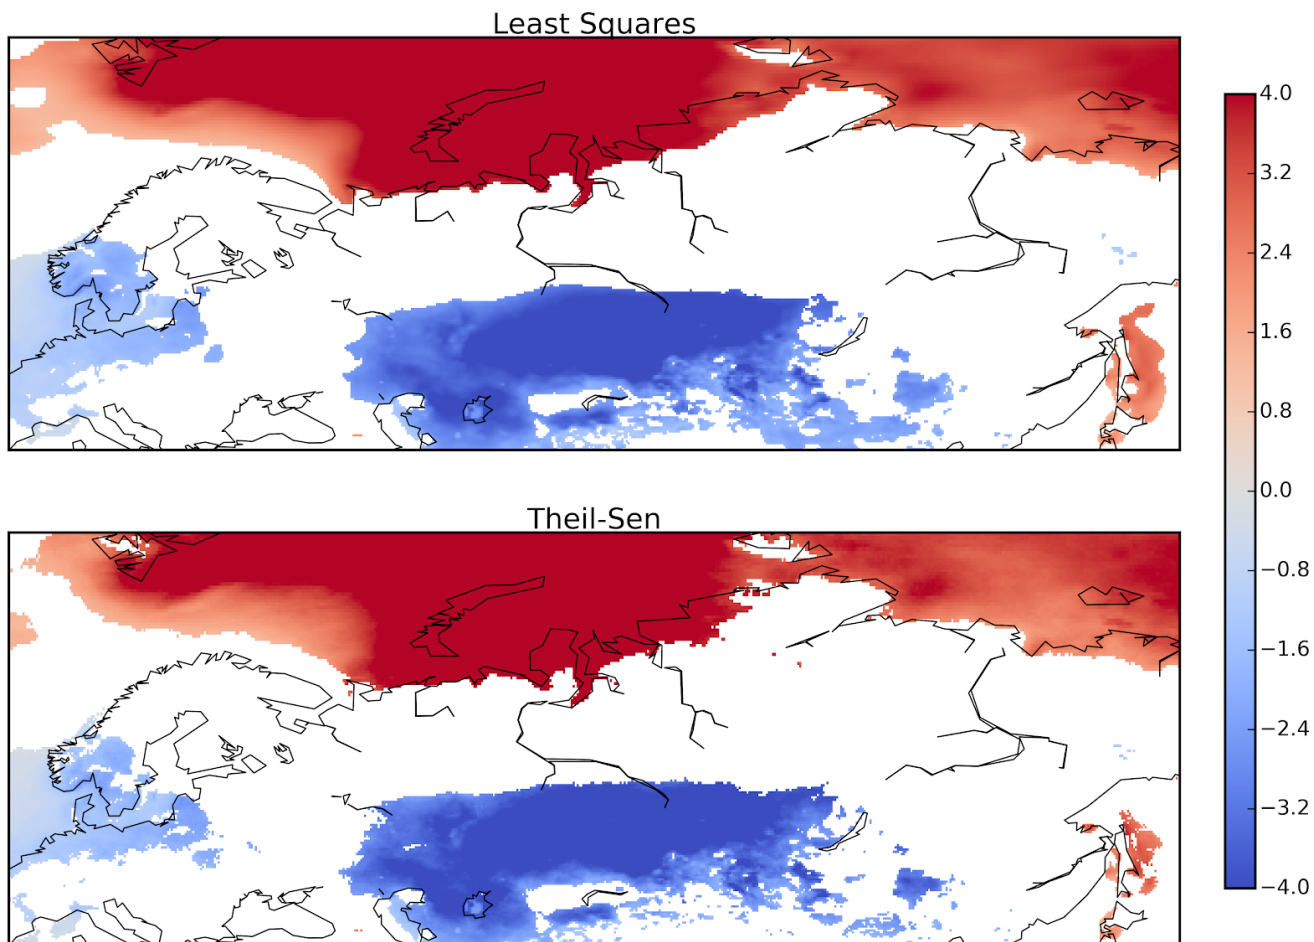

**Figure S1.** Trends in DJF mean 2-metre air temperature in ERA5 reanalysis for 1998 to 2012, calculated using the least squares (top) and Theil-Sen (bottom) methods. These are shown over the domain of 0-150°E and 40-80°N. Trends are only shown for locations that are significantly different at the 95% level from the mean Northern Hemisphere trend for the given period.

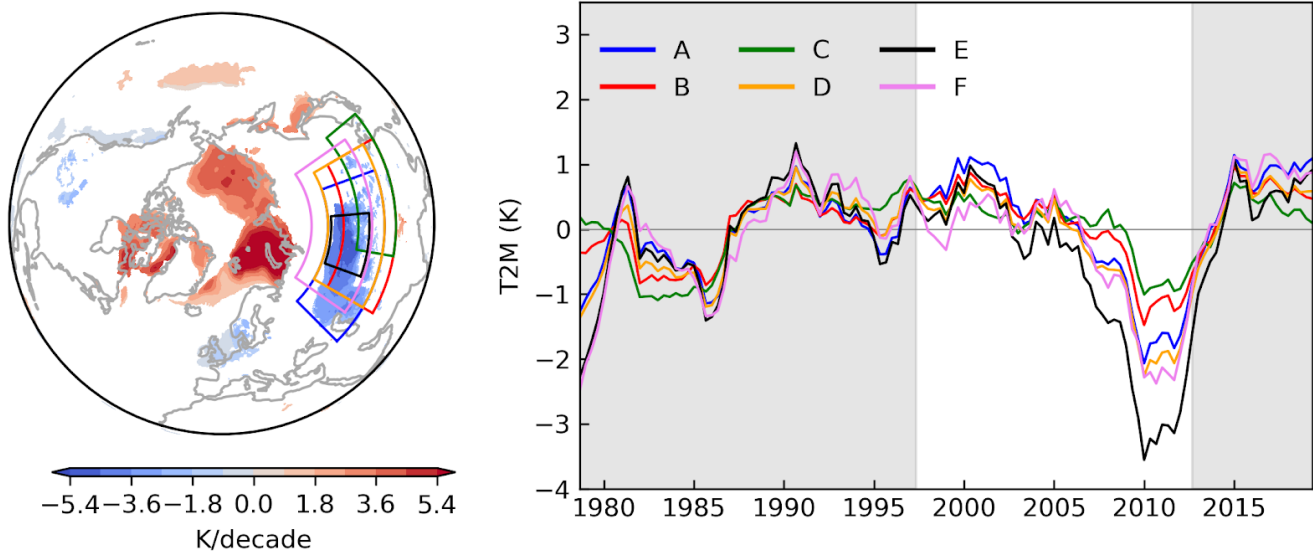

**Figure S2.** Left: Trends in 2 metre air temperature as in Figure 1. Boxes with various colors show the selected regions for calculating the Eurasian cooling. Regions include 40-60°N, 45-110°E (blue), 35-55°N, 60-120°E (yellow; He et al. 2020), 35-50°N, 80-130°E (green; Kug et al. 2015), 40-60°N, 60-120°E (orange; Mori et al. 2014), 46-59°N, 70-95°E (black; Outten and Esau 2012 Figure 1) and 45-65°N, 55E-125°E (violet; Ogawa et al. 2018). Right: Anomaly of 2 metre air temperature averaged over the various boxes for the period of 1998 to 2012.

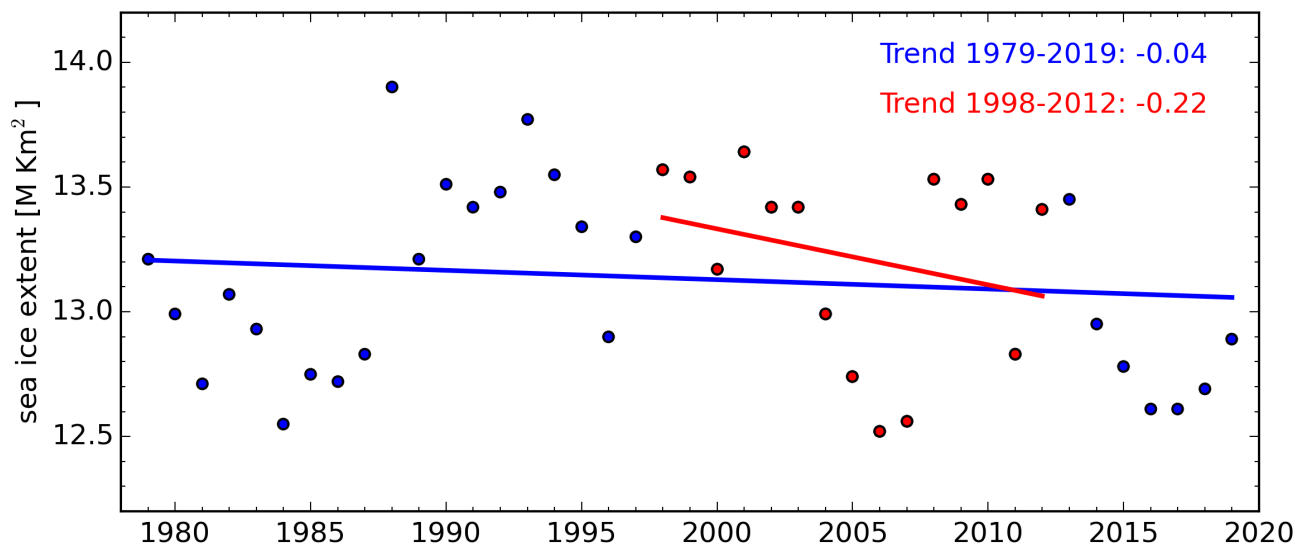

**Figure S3.** The March Arctic sea ice extent (dots) and its linear trend (solid lines) in National Snow Ice Data Centre (NSIDC) dataset in million sq. km. Trends are calculated over two periods, 1979-2019 (blue) and 1998-2012 (red).

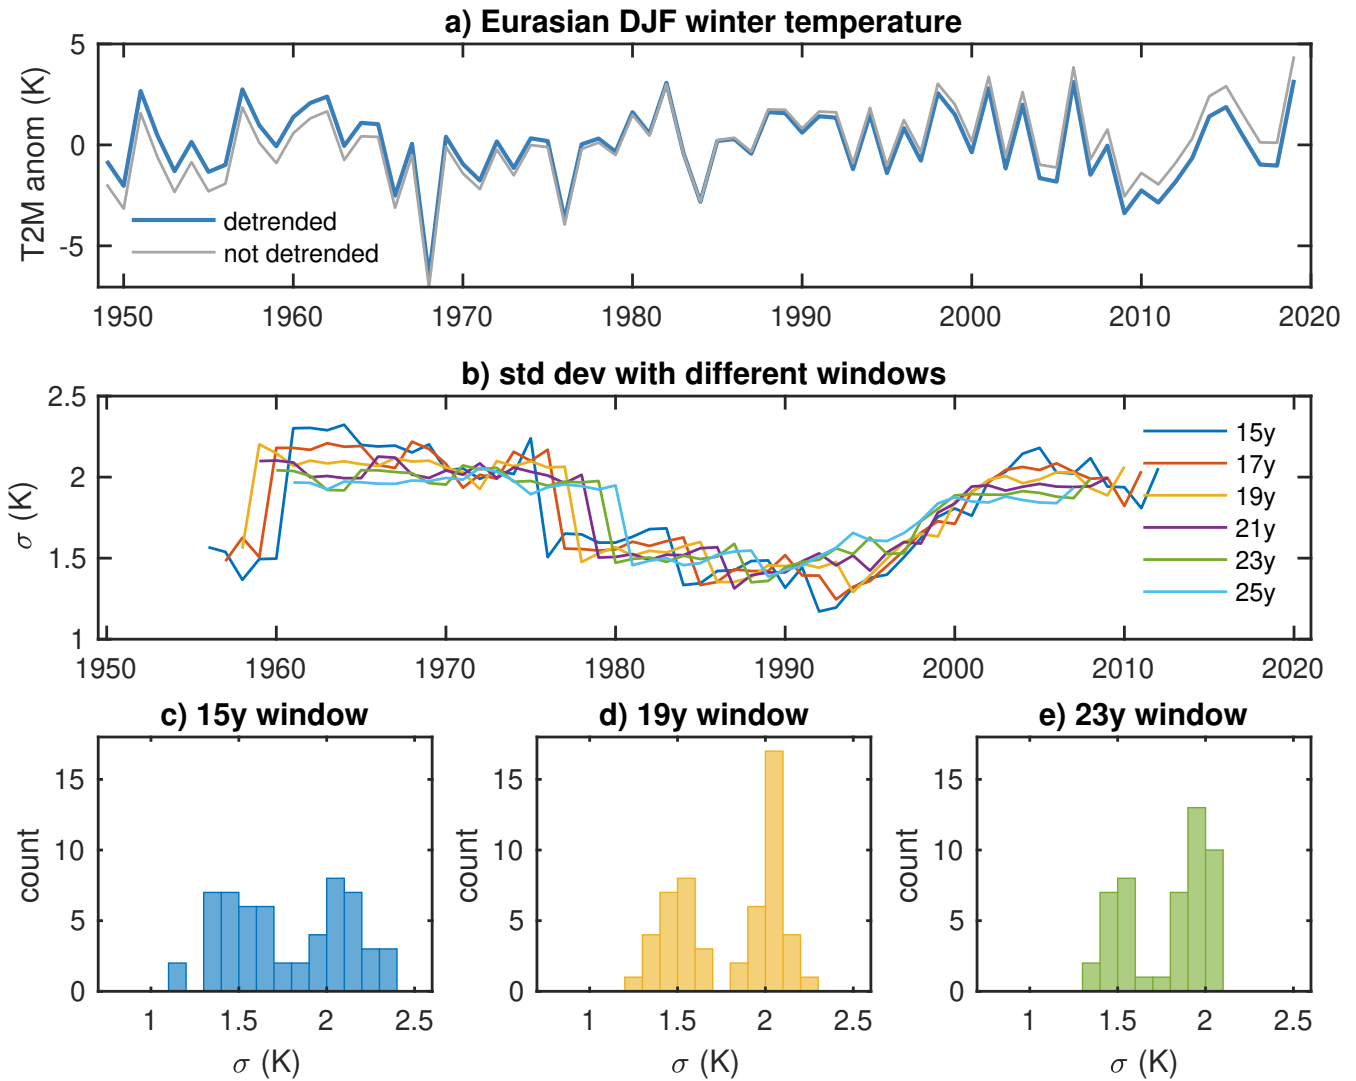

**Figure S4.** Eurasian winter temperature variability. a) Time series of 2-metre winter temperature anomalies from the ERA5 reanalysis area-averaged over 40-60°N and 60-120°E. The year corresponds to the December of each DJF season. b) Centered running standard deviation  $\sigma$  of the temperature time series for different windows (in years). (c-e) Histograms of standard deviations for three of the window lengths in (b).
